# Supplementary material for: Impact of Simultaneous Consideration of Cardiac and Vascular Function on Long-Term All-Cause and Cardiovascular Mortality
Source: PubMed Central journal article supplement (PMC6947191; doi:10.3390/jcm8122145), 2019-12-04
Supplement: jcm-08-02145-s001.pdf [file jcm-08-02145-s001.pdf]

**Supplement Table 1: Cause of cardiovascular mortality (ICD-10).**

| Cause of cardiovascular mortality             | ICD-10                                    |
|-----------------------------------------------|-------------------------------------------|
| Hypertensive disease                          | I10-I15                                   |
| Cardiac disease (Except hypertensive disease) | I01-I02.0, I05-I09, I20-I25, I27, I30-I52 |
| Cerebrovascular disease                       | I60-I69                                   |
| Atherosclerosis vascular disease              | I70                                       |
| Aortic aneurysm and dissection                | I71                                       |

**Supplement Table 2: Summary of studies of evaluation of PWV in HF patients for outcome prediction.**

| Study                                       | Study population                                                                                                                                          | Follow-up                 | Outcome                                                                                                                                             | Ref |
|---------------------------------------------|-----------------------------------------------------------------------------------------------------------------------------------------------------------|---------------------------|-----------------------------------------------------------------------------------------------------------------------------------------------------|-----|
| Sung SH et al. (2011)                       | 80 patients with acute HF                                                                                                                                 | 174 ± 32 days             | PWV were significantly lower in patients without events than those with events (HF rehospitalization /nonfatal MI/nonfatal stroke/ mortality).      | 1   |
| Demir S et al. (2013)                       | 98 HF patients with LVEF ≤ 35%                                                                                                                            | 18 months                 | PWV was powerful determinants of mortality (OR: 0.853, p = 0.025)                                                                                   | 2   |
| Regnault V et al. (EPHESUS substudy) (2014) | 306 patients with acute MI and HF with LVEF < 40%,                                                                                                        | 16 months                 | Higher LVEF or pulse pressure associated with lower all-cause and CV mortality. Increased PWV was associated with higher all-cause and CV mortality | 3   |
| Tokitsu et al. (2018)                       | 502 patients with HFpEF                                                                                                                                   | Mean 1017 days            | Patients with PWV > 1900 cm/s and < 1300 cm/s had a significant higher total CV events than 1300 ≤ PWV ≤ 1900 cm/s                                  | 4   |
| Huang WM et al. (2019)                      | Cohort A: 230 patients (HFrfEF, HFmrEF, HFpEF)<br>Cohort B: 2677 patients                                                                                 | Mean 21.3 +/- 13.6 months | HFmrEF had higher PWV than reduced HFrfEF<br>HFmrEF and HFrfEF had higher three-year mortality than HFpEF                                           | 5   |
| Our present study                           | 958 patients into four group:<br>Group 1: low PWV, high LVEF<br>Group 2: low PWV, low LVEF<br>Group 3: high PWV, high LVEF<br>Group 4: high PWV, low LVEF | Median 93 months          | Group 4: highest all-cause and CV mortality.<br>Group 1 vs 3: similar overall and CV mortality. Group 2: higher CV mortality than group 3.          |     |

CV: cardiovascular; HFmrEF: heart failure with mid-range ejection fraction; HFpEF: heart failure with preserved ejection fraction; HFrEF: heart failure with reduced ejection fraction; LVEF: left ventricular ejection fraction; MI: myocardial infarction; PWV: pulse wave velocity; Ref: reference.

Ref 1: Sung SH, Yu WC, Cheng HM, et al. Pulsatile hemodynamics and clinical outcomes in acute heart failure. *Am J Hypertens*. 2011;24(7):775-82.

Ref 2: Demir S, Akpınar O, Akkus O, et al. The prognostic value of arterial stiffness in systolic heart failure. *Cardiol J*. 2013;20(6):665-71.

Ref 3: Regnault V, Lagrange J, Pizard A, et al. Opposite predictive value of pulse pressure and aortic pulse wave velocity on heart failure with reduced left ventricular ejection fraction: insights from an Eplerenone Post-Acute Myocardial Infarction Heart Failure Efficacy and Survival Study (EPHESUS) substudy. *Hypertension*. 2014;63(1):105-11.

Ref 4: Tokitsu T, Yamamoto E, Oike F, et al. Clinical significance of brachial-ankle pulse-wave velocity in patients with heart failure with preserved left ventricular ejection fraction. *J Hypertens*. 2018;36(3):560-568.

Ref 5: Huang WM, Sung SH, Yu WC, et al. Perturbations of pulsatile hemodynamics and clinical outcomes in patients with acute heart failure and reduced, mid-range or preserved ejection fraction. *PLoS One*. 2019;14(8):e022018.
